# Supplementary material for: Effects of the Combination of β-Hydroxy-β-Methyl Butyrate and R(+) Lipoic Acid in a Cellular Model of Sarcopenia
Source: PubMed Central journal article supplement (PMC7249096; doi:10.3390/molecules25092117), 2020-04-30
Supplement: molecules-25-02117-s001.pdf [file molecules-25-02117-s001.pdf]

**Supplementary Table S1. Viability of C2C12 myoblasts:**

| Cell viability %                              |                               |                                |                               |                             |
|-----------------------------------------------|-------------------------------|--------------------------------|-------------------------------|-----------------------------|
| dexamethasone concentration ( $\mu\text{M}$ ) |                               |                                |                               |                             |
|                                               | 0.01                          | 0.03                           | 0.1                           | 10                          |
| 0                                             | 69.1 $\pm$ 1.8                | 62.4 $\pm$ 4.6                 | 58.9 $\pm$ 4.3                | 52.3 $\pm$ 2.3              |
| R(+)<br>LA 1 $\mu\text{M}$                    | 67.7 $\pm$ 1.7                | 63.8 $\pm$ 1.8                 | 64.4 $\pm$ 5.5                | 54.5 $\pm$ 1.2              |
| R(+)<br>LA 10 $\mu\text{M}$                   | 70.5 $\pm$ 2.0                | 58.6 $\pm$ 1.9                 | 66.2 $\pm$ 7.3                | 57.9 $\pm$ 0.9              |
| R(+)<br>LA 30 $\mu\text{M}$                   | 65.3 $\pm$ 2.9                | 57.0 $\pm$ 2.2                 | 64.8 $\pm$ 6.0                | 57.2 $\pm$ 1.6              |
| R(+)<br>LA 100 $\mu\text{M}$                  | 83.9 $\pm$ 3.6 <sup>^</sup>   | 60.5 $\pm$ 1.1                 | 71.3 $\pm$ 7.0                | 64.3 $\pm$ 1.3 <sup>^</sup> |
| R(+)<br>LA 300 $\mu\text{M}$                  | 85.9 $\pm$ 4.9 <sup>^</sup>   | 79.1 $\pm$ 6.6 <sup>^</sup>    | 74.8 $\pm$ 8.0 #              | 74.1 $\pm$ 2.0 <sup>^</sup> |
| HMB 30 $\mu\text{M}$                          | 70.1 $\pm$ 1.5                | 72.7 $\pm$ 9.6                 | 47.5 $\pm$ 6.6                | 49.1 $\pm$ 4.0              |
| HMB 100 $\mu\text{M}$                         | 71.8 $\pm$ 2.0                | 73.2 $\pm$ 9.2                 | 49.8 $\pm$ 4.9                | 47.0 $\pm$ 3.2              |
| HMB 300 $\mu\text{M}$                         | 85.2 $\pm$ 3.8 <sup>^</sup>   | 84.8 $\pm$ 9.4 <sup>^</sup>    | 56.5 $\pm$ 6.0                | 44.5 $\pm$ 2.7              |
| HMB 1 mM                                      | 97.9 $\pm$ 4.9 <sup>^^</sup>  | 100.2 $\pm$ 10.9 <sup>^^</sup> | 69.7 $\pm$ 1.6                | 47.8 $\pm$ 3.5              |
| HMB 3 mM                                      | 159.1 $\pm$ 6.7 <sup>^^</sup> | 108.5 $\pm$ 7.1 <sup>^^</sup>  | 129.4 $\pm$ 2.8 <sup>^^</sup> | 52.4 $\pm$ 2.1              |

Cell viability of C2C12 myoblasts treated with increasing concentrations of dexamethasone (0.01 - 10  $\mu\text{M}$ ) in the absence or in the presence of increasing concentration of R(+)  
LA (1 – 300  $\mu\text{M}$ ) or HMB (30  $\mu\text{M}$  – 3 mM) for 48 h. Cell viability was measured by MTT assay. Control condition was arbitrarily set as 100% and values are expressed as the mean  $\pm$  S.E.M. of 3 experiments. <sup>^</sup>P<0.05 and <sup>^^</sup>P<0.01 vs the same treatment with dexamethasone in the absence of R(+)  
LA and HMB.

**Supplementary Table S2. Viability of C2C12 myoblasts:**

| cell viability %                                |                 |                   |                   |
|-------------------------------------------------|-----------------|-------------------|-------------------|
| concentration                                   | R(+) <b>LA</b>  | HMB               | mixture           |
| 0 $\mu$ M                                       | 100 $\pm$ 2.4   | 100 $\pm$ 2.4     |                   |
| 1 $\mu$ M                                       | 96.9 $\pm$ 1.2  | 98.3 $\pm$ 2.9    |                   |
| 10 $\mu$ M                                      | 92.2 $\pm$ 2.1  | 100.3 $\pm$ 6.9   |                   |
| 30 $\mu$ M                                      | 92.8 $\pm$ 3.1  | 90.8 $\pm$ 7.4    |                   |
| 100 $\mu$ M                                     | 96.5 $\pm$ 5.1  | 93.2 $\pm$ 5.7    |                   |
| 300 $\mu$ M                                     | 110.5 $\pm$ 3.3 | 92.6 $\pm$ 6.3    |                   |
| 1 mM                                            |                 | 113.8 $\pm$ 3.1   |                   |
| 3 mM                                            |                 | 194.7 $\pm$ 6.9** |                   |
| R(+) <b>LA</b> 30 $\mu$ M +<br>HMB 100 $\mu$ M  |                 |                   | 106.2 $\pm$ 2.1   |
| R(+) <b>LA</b> 30 $\mu$ M +<br>HMB 300 $\mu$ M  |                 |                   | 125.0 $\pm$ 2.6*  |
| R(+) <b>LA</b> 100 $\mu$ M +<br>HMB 300 $\mu$ M |                 |                   | 128.0 $\pm$ 1.6*  |
| R(+) <b>LA</b> 100 $\mu$ M +<br>HMB 1 mM        |                 |                   | 169.4 $\pm$ 2.0*  |
| R(+) <b>LA</b> 300 $\mu$ M +<br>HMB 3 mM        |                 |                   | 181.7 $\pm$ 4.1** |

Cell viability of C2C12 myoblasts treated with increasing concentrations of R(+)**LA** (1-300  $\mu$ M) or HMB (1  $\mu$ M – 3 mM) or the combinations of both for 48 h. Control condition was arbitrarily set as 100% and values are expressed as the mean  $\pm$  S.E.M. of 3 experiments. \*P<0.05 and \*\*P<0.01 vs control (0  $\mu$ M).

**Supplementary Table S3. Superoxide anion levels in C2C12 myoblasts:**

---

**( $\mu\text{M O}_2^-/\text{mg protein}/4\text{h}$ )**

---

| <b>dexamethasone concentration (<math>\mu\text{M}</math>)</b> | <b>48 h incubation</b> |
|---------------------------------------------------------------|------------------------|
| 0                                                             | 6178 $\pm$ 426         |
| 0.01                                                          | 5877 $\pm$ 401         |
| 0.03                                                          | 8328 $\pm$ 389*        |
| 0.1                                                           | 9828 $\pm$ 549*        |
| 0.3                                                           | 10596 $\pm$ 255*       |
| 1                                                             | 11390 $\pm$ 562*       |
| 10                                                            | 10980 $\pm$ 518*       |
| 100                                                           | 12012 $\pm$ 445*       |

$\text{O}_2^-$  concentration of C2C12 myoblasts treated with increasing concentration of dexamethasone (0.01 - 100  $\mu\text{M}$ ) for 4 h. The non-specific absorbance was measured in the presence of SOD (300 mU/ml) and subtracted from the total value. Values are expressed as  $\mu\text{M}/\text{mg protein}/4\text{h}$ . Bars represent the mean  $\pm$  S.E.M. of 3 experiments. \* $P < 0.05$  vs control (0  $\mu\text{M}$ ).
